# Supplementary material for: A survey of Kt/V and analysis of influencing factors in hemodialysis patients in northern China: A multicenter cross-sectional study
Source: Research Square preprint supplement (doi:10.21203/rs.3.rs-6520173/v1), 2025-06-16
Supplement: Supplementary file 1 [file 5ec2b0da68c465ef0319bba8.xlsx]

## Sheet: Sheet1
Hospital name	Number of hemodialysis patients	Hospital level	Percentage
Hohhot First Hospital	353	Third-grade class-B	0.269
Affiliated Hospital of Inner Mongolia Medical University	320	Third-grade class-A	0.244
Inner Mongolia People’s Hospital	210	Third-grade class-A	0.16
International Mongolian Hospital of Inner Mongolia	108	Third-grade class-A	0.082
Hohhot Mongolian Hospital of traditional Chinese medicine	95	Third-grade class-A	0.072
Inner Mongolia Corps Hospital of the Chinese People's Armed Police Force	64	Third-grade class-B	0.049
Hohhot second hospital of Inner Mongolia autonomous region	63	Third-grade class-A	0.048
Tumd Left Banner People's Hospital	48	Second-grade class-B	0.037
Inner Mongolia Autonomous Region Hospital of Traditional Chinese Medicine	42	Third-grade class-A	0.033
Affiliated Cancer Hospital of Inner Mongolia Medical University	9	Third-grade class-A	0.007
Total	1313		1
