# Supplementary material for: A survey of Kt/V and analysis of influencing factors in hemodialysis patients in northern China: A multicenter cross-sectional study
Source: Research Square preprint supplement (doi:10.21203/rs.3.rs-6520173/v1), 2025-06-16
Supplement: Supplementary file 2 [file 86fcfd859c49d7e834dae25b.xlsx]

## Sheet: Sheet1
Dialysis membrane materials under comparison		Estimate	SE	t	P
Polysulfone -polyvinylpyrrolidone blend	Polysulfone	0.094	0.017	5.463	< 0.001
Cellulose Triacetate	Polysulfone	-0.015	0.027	-0.569	0.978
Polyamide	Polysulfone	-0.045	0.028	-1.627	0.461
Polyethersulfone	Polysulfone	0.029	0.031	0.925	0.879
Cellulose Triacetate	Polysulfone -polyvinylpyrrolidone blend	-0.109	0.028	-3.918	0.001
Polyamide	Polysulfone -polyvinylpyrrolidone blend	-0.14	0.029	-4.828	< 0.001
Polyethersulfone	Polysulfone -polyvinylpyrrolidone blend	-0.065	0.032	-2.014	0.245
Polyamide	Cellulose Triacetate	-0.03	0.035	-0.856	0.906
Polyethersulfone	Cellulose Triacetate	0.044	0.038	1.159	0.761
Polyethersulfone	Polyamide	0.075	0.039	1.903	0.299
