# Supplementary material for: A survey of Kt/V and analysis of influencing factors in hemodialysis patients in northern China: A multicenter cross-sectional study
Source: Research Square preprint supplement (doi:10.21203/rs.3.rs-6520173/v1), 2025-06-16
Supplement: Supplementary file 3 [file 8b06258e3ca5a0e4b773ee27.xlsx]

## Sheet: Sheet1
	β	SE	P	Wald	OR	95% CI
Sex
Male					1
Female	-2.416	0.244	<0.001	97.654	0.089	0.054	0.142
Primary disease type
Primary glomerulonephritis					1
Secondary glomerular diseases	-0.181	0.281	0.52	0.415	0.835	0.477	1.439
Interstitial nephritis	-0.542	0.523	0.3	1.071	0.582	0.196	1.554
Polycystic kidney disease	0.903	0.493	0.067	3.349	2.466	0.917	6.42
Unknown cause of disease	-0.322	0.209	0.124	2.372	0.725	0.48	1.09
BMI
18.5-23.9					1
24-27.9	1.708	0.213	<0.001	64.465	5.516	3.657	8.427
≥28	2.758	0.298	<0.001	85.359	15.761	8.895	28.71
<18.5	-0.56	0.43	0.193	1.698	0.571	0.231	1.268
Dialysis vintage (months)	-0.004	0.003	0.251	1.318	0.996	0.99	1.002
Dialyzer membrane material
Polysulfone					1
Polysulfone -polyvinylpyrrolidone blend	-0.839	0.217	<0.001	15.023	0.432	0.281	0.657
Cellulose triacetate	-0.586	0.329	0.075	3.165	0.557	0.287	1.048
Polyamide	0.173	0.342	0.614	0.255	1.189	0.604	2.318
Polyethersulfone	-0.807	0.406	0.047	3.984	0.446	0.196	0.97
Single dialysis session (hours)	-1.829	0.449	<0.001	16.581	0.161	0.066	0.385
Actual ultrafiltration volume (L)	0.088	0.094	0.345	0.891	1.093	0.91	1.314
Actual blood flow rate (ml/min)	-0.03	0.005	<0.001	31.584	0.97	0.96	0.981
Duration of vascular access use (months)	-0.01	0.004	0.017	5.66	0.99	0.982	0.998
Albumin (g/L)	-0.032	0.026	0.229	1.445	0.969	0.92	1.021
Total Cholesterol (mmol/L)	-0.258	0.094	0.006	7.508	0.772	0.64	0.927
