# Supplementary material for: A survey of Kt/V and analysis of influencing factors in hemodialysis patients in northern China: A multicenter cross-sectional study
Source: Research Square preprint supplement (doi:10.21203/rs.3.rs-6520173/v1), 2025-06-16
Supplement: Supplementary file 4 [file f085f1d296607ec5c2d720f1.xlsx]

## Sheet: Sheet1
Characteristics	Population (N=996)	Adequate (N=692)	Inadequate (N=304)	P	OR	95% CI
Sex				<0.001
Male	589	331 (47.8%)	258 (84.9%)
Female	407	361 (52.2%)	46 (15.1%)		0.163	0.114-0.229
Age group (years)				0.105
18-44	75	162 (23.4%)	91 (29.9%)
45-59	568	268 (38.7%)	106 (34.9%)		0.591	0.362-0.975
60-80	353	247 (35.7%)	106 (34.9%)		0.609	0.366-1.023
Primary disease type				0.023
Primary glomerulonephritis	448	317 (45.8%)	171 (56.2%)
Secondary glomerular diseases	142	109 (15.8%)	33 (10.9%)		0.561	0.36-0.856
Interstitial nephritis	31	24 (3.5%)	7 (2.3%)		0.541	0.212-1.218
Polycystic kidney disease	31	20 (2.9%)	11 (3.6%)		1.019	0.462-2.141
Unknown cause of disease	104	222 (32.1%)	82 (27%)		0.685	0.499-0.935
Dialysis frequency				0.68
≥3/W	785	541 (78.2%)	244 (80.3%)
2.5/W	193	139 (20.1%)	54 (17.8%)		0.861	0.604-1.215
2/W	18	12 (1.7%)	6 (2%)		1.109	0.382-2.89
BMI (kg/m2)				<0.001
18.5-23.9	506	414 (59.8%)	92 (30.3%)
24-27.9	275	150 (21.7%)	125 (41.1%)		3.75	2.707-5.216
≥28	123	45 (6.5%)	78 (25.7%)		7.8	5.096-12.08
<18.5	92	83 (12%)	9 (3%)		0.488	0.221-0.958
Dialysis vintage (months)		25(10,54)	51(21,96)	<0.001	0.988	0.985-0.991
Blood pressure (mmHg)				0.306
Normal blood pressure	101	71 (10.3%)	30 (9.9%)
Elevated blood pressure	239	168 (24.3%)	71 (23.4%)		1	0.605-1.678
Mild hypertension	338	222 (32.1%)	117 (38.5%)		1.247	0.776-2.041
Moderate hypertension	223	165 (23.8%)	58 (19.1%)		0.832	0.496-1.411
Severe hypertension	94	66 (9.5%)	28 (9.2%)		1.004	0.542-1.858
Dialyzer membrane area (m2)				0.121
1.4	266	189 (27.3%)	77 (25.3%)
1.5	88	67 (9.7%)	21 (6.9%)		0.769	0.433-1.326
1.6	62	48 (6.9%)	14 (4.6%)		0.716	0.362-1.343
1.8	580	388 (56.1%)	192 (63.2%)		1.215	0.887-1.672
Dialyzer membrane material				0.002
Polysulfone	453	289 (41.8%)	164 (53.9%)
Polysulfone -polyvinylpyrrolidone blend	308	235 (34%)	73 (24%)		0.547	0.394-0.755
Cellulose triacetate	92	68 (9.8%)	24 (7.9%)		0.622	0.37-1.016
Polyamide	81	52 (7.5%)	29 (9.5%)		0.983	0.594-1.597
Polyethersulfone	62	48 (6.9%)	14 (4.6%)		0.514	0.266-0.937
Single dialysis session duration (hours)		4(4,4）	4(4,4）	0.009	0.396	0.215-0.719
Actual ultrafiltration volume (L)		2.5 ± 1.0	2.7 ± 1.2	0.029	1.165	1.027-1.323
Anticoagulants type				0.934
Low molecular weight heparin	940	652 (94.2%)	288 (94.7%)
Unfractionated heparin	36	26 (3.8%)	10 (3.3%)		0.871	0.395-1.775
No heparin	20	14 (2%)	6 (2%)		0.97	0.341-2.445
Sodium ion concentration (mmol/L)		138.8 ± 2.5	139.0 ± 2.3	0.437	1.022	0.967-1.081
Actual blood flow rate (ml/min)		229.3 ± 19.5	223.3 ± 20.1	<0.001	0.985	0.978-0.992
Vascular access type				0.101
Fistula	787	557 (80.5%)	230 (75.7%)
Temporary catheter	63	33 (4.8%)	30 (9.9%)		0.548	0.326-0.93
Longterm catheter	146	102 (14.7%)	44 (14.5%)		0.874	0.602-1285
Duration of vascular access use (months)		22(8,47)	38(14,72)	<0.001	0.987	0.981-0.99
Albumin (g/L)		37.4 ± 3.0	36.7 ± 4.2	0.006	0.939	0.903-0.977
Total Cholesterol (mmol/L)		4.2 ± 1.0	3.7 ± 1.0	<0.001	0.639	0.55-0.74
Triglycerides (mmol/L)		2.1 ± 1.5	2.2 ± 1.7	0.503	1.029	0.945-1.117
Hemoglobin (g/L)		105.8 ± 17.2	103.7 ± 19.1	0.089	0.993	0.985-1.001
Platelets (109/L)		174.1 ± 59.0	181.6 ± 61.6	0.071	1.002	1-1.004
